# Supplementary material for: Phylogeographic and genome-wide investigations of Vietnam ethnic groups reveal signatures of complex historical demographic movements
Source: PubMed Central journal article supplement (PMC5626762; doi:10.1038/s41598-017-12813-6), 2017-10-03
Supplement: 41598_2017_12813_MOESM5_ESM.pdf [file 41598_2017_12813_MOESM5_ESM.pdf]

# Phylogeographic and genome-wide investigations of Vietnam ethnic groups reveal signatures of complex historical demographic movements

Pischedda S, Barral-Arca R, Gómez-Carballea A, Pardo-Seco J, Catelli ML, Álvarez-Iglesias V, Cárdenas JM, Nguyen ND, Ha HH, Le AT, Martínón-Torres F, Vullo C, Salas A

## Supplementary Data

**Figure S1.** Phylogenetic networks of HVS-I mtDNA Vietnamese sequences.

**Figure S2.** Maximum parsimony trees based on CR sequences representing haplogroup M7b1a1f (A) and F1f (B). See Figure 3 for more information.

**Figure S3.** EBSPs (with 95% CI) of haplogroup F1f and M7b1a1f obtained from complete mitogenomes.

**Figure S4.** EBSP of main Vietnamese ethnics.

**Figure S5.** MDS plot of IBS values considering different SEA populations (Table S2) and one European (CEU) and one African population (YRI).

Figure S1.

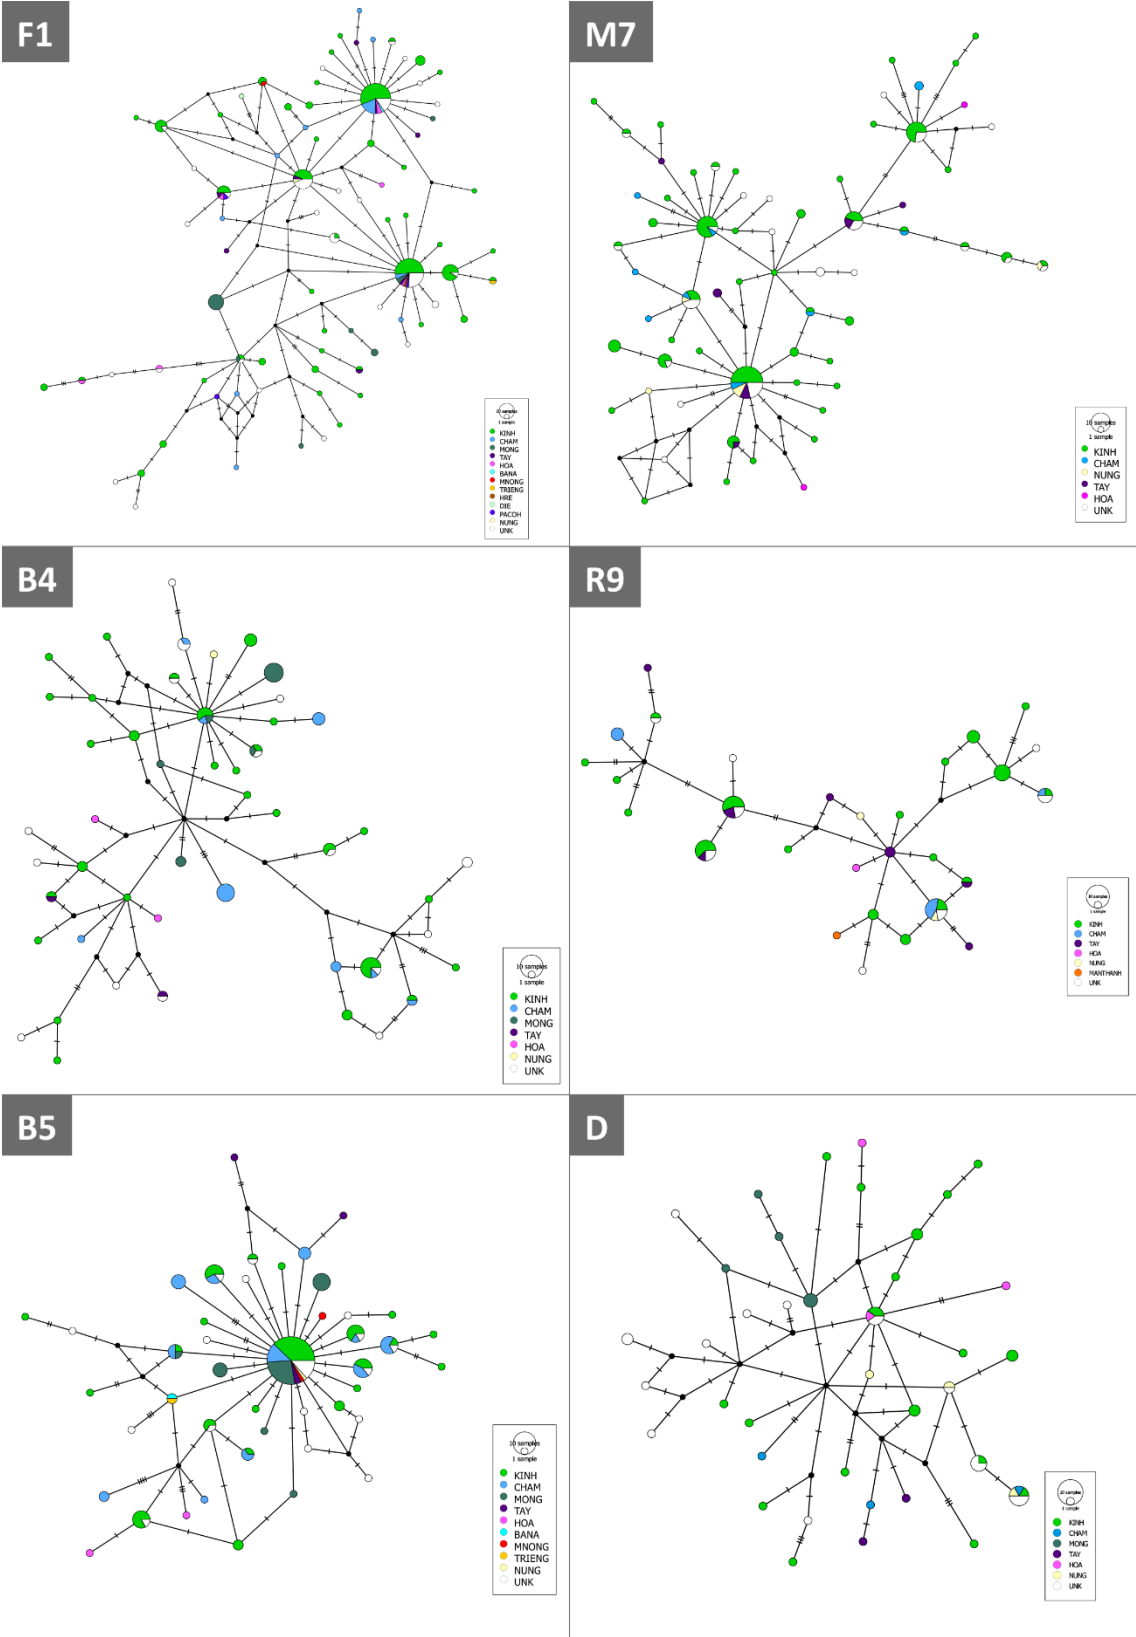

Figure S1.

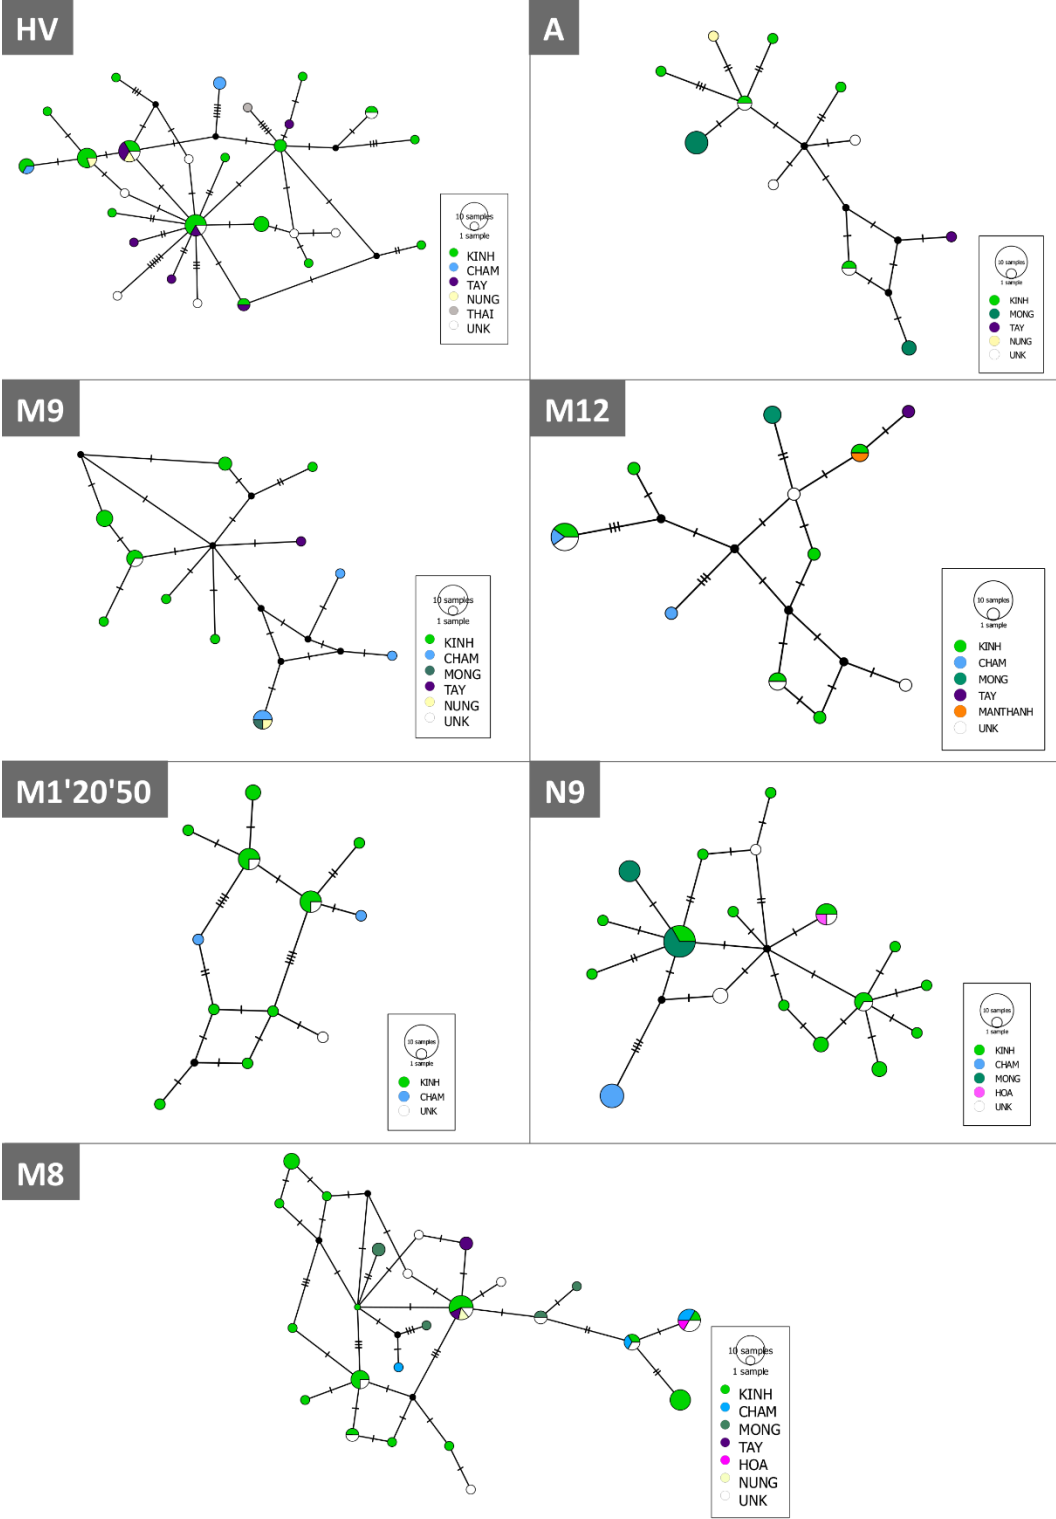



Figure S3.

A

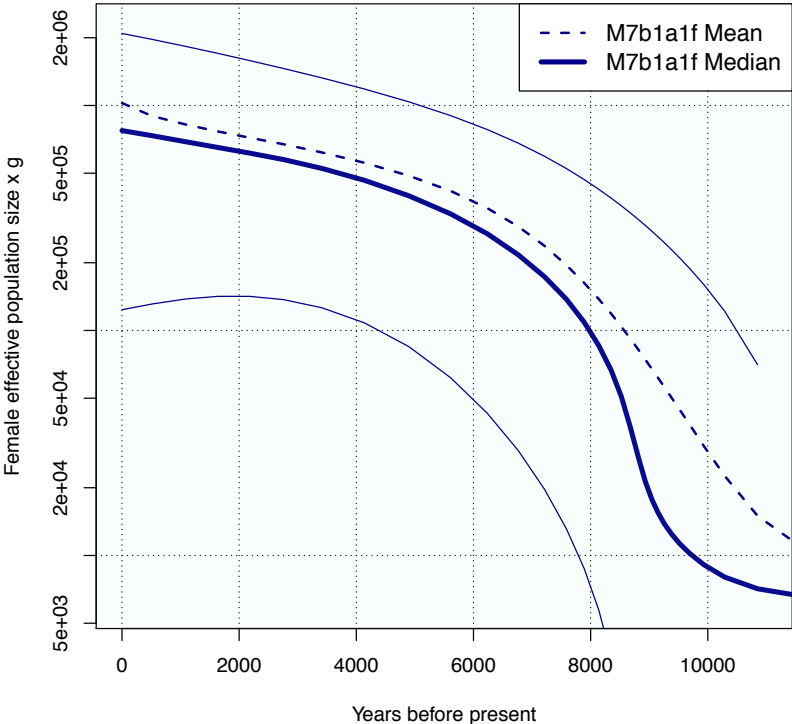

B

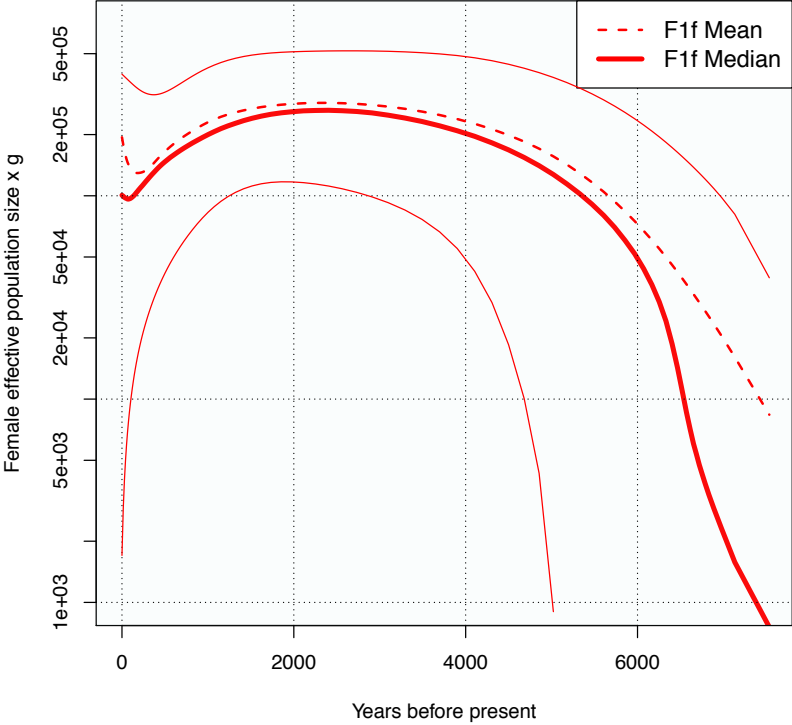

Figure S4.

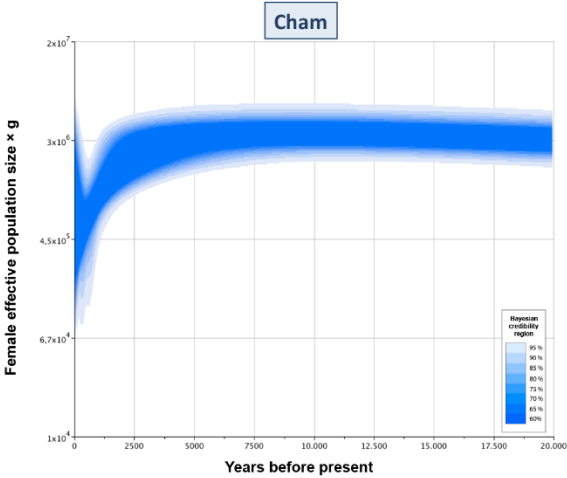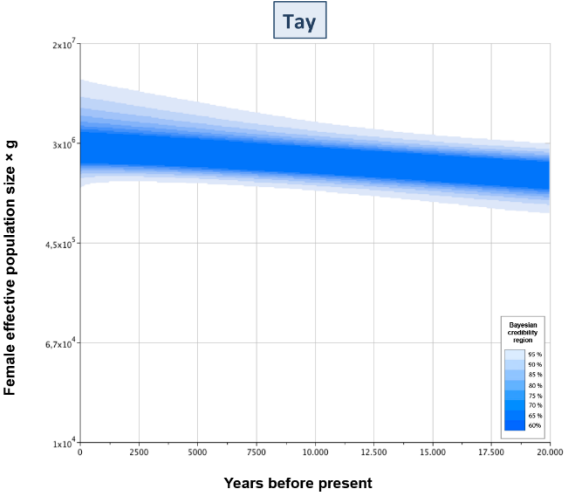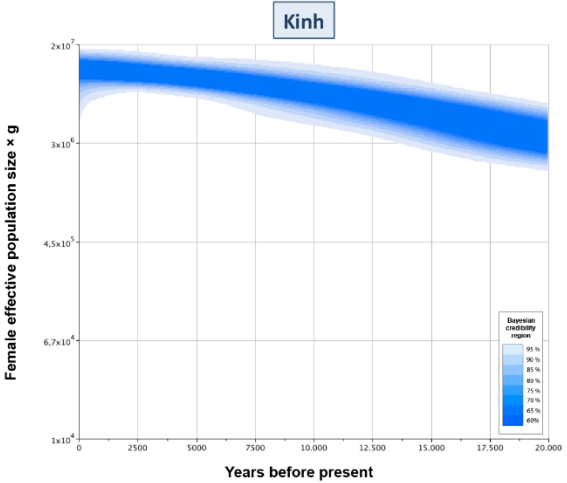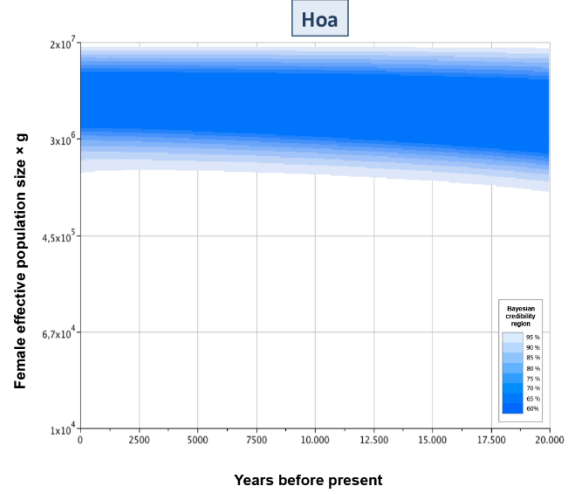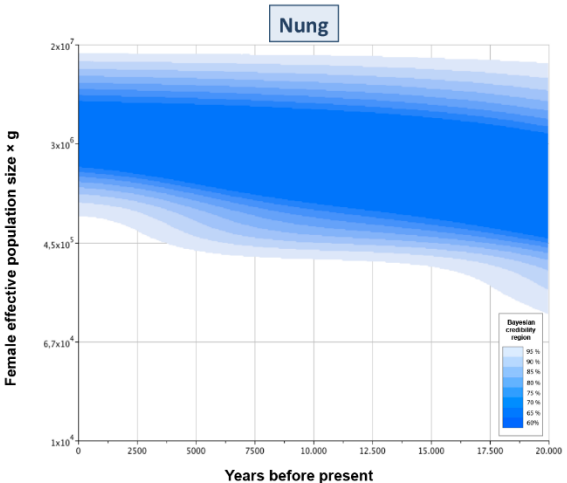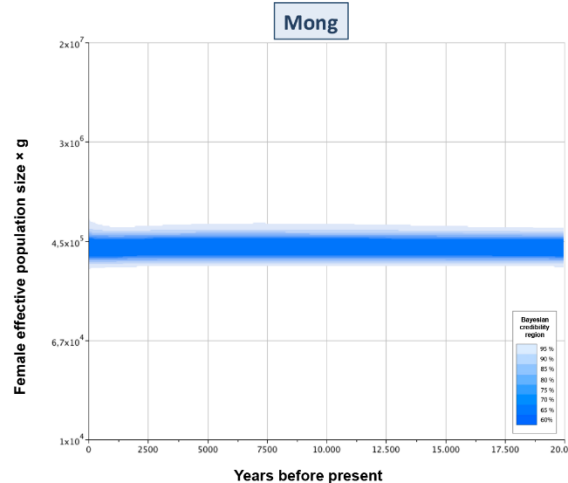

Figure S5.

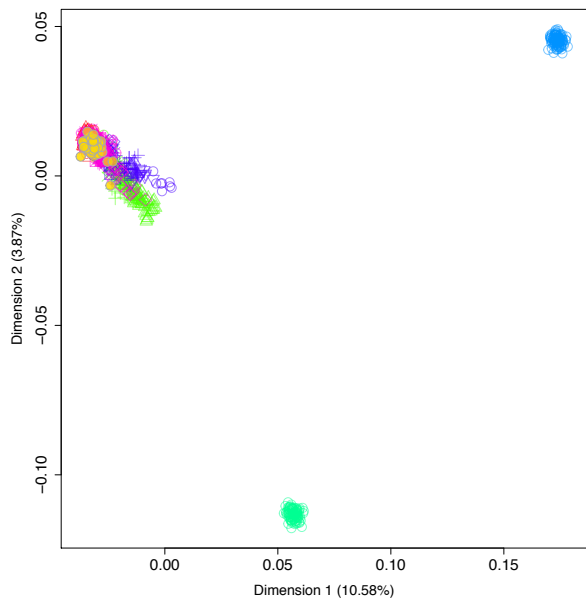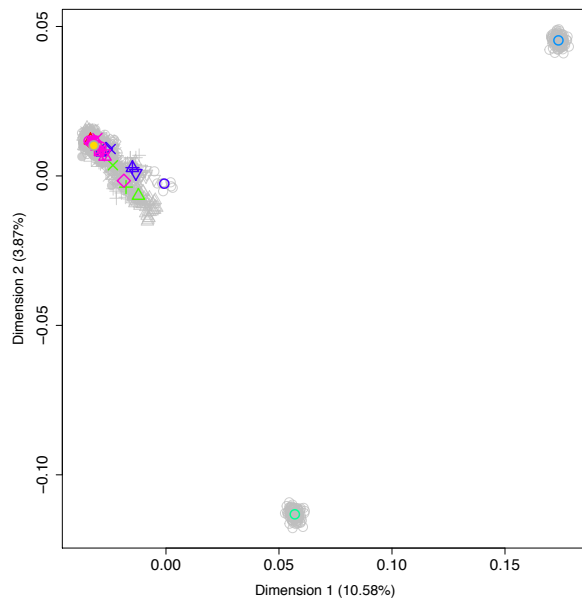

- Europe**
- CEU
- Africa**
- YRI
- China**
- CHS
- △ CDX
- Malaysia**
- Bidayuh
- △ Negrito
- + Malay
- × Proto-Malay
- Philippines**
- Ayta
- △ Agta
- + Ati
- × Iraya
- ◇ Minanubu
- ▽ Mamanwa
- Filipino
- Thailand**
- Hmong (Miao)
- △ Karen
- + Lawa
- × Mlabri
- ◇ Mon
- ▽ Paluang
- Plang
- \* Tai Khuen
- ◇ Tai Lue
- ⊗ H'tin
- ▲ Tai Yuan
- Tai Yong
- ⊗ Yao
- Vietnam**
- KHV
